# Supplementary material for: Plant-Produced Glycosylated and In Vivo Deglycosylated Receptor Binding Domain Proteins of SARS-CoV-2 Induce Potent Neutralizing Responses in Mice
Source: MDPI journal article supplement (doi:10.3390/v13081595), 2021-08-12
Supplement: s1 [file s1]

## Supplementary Materials

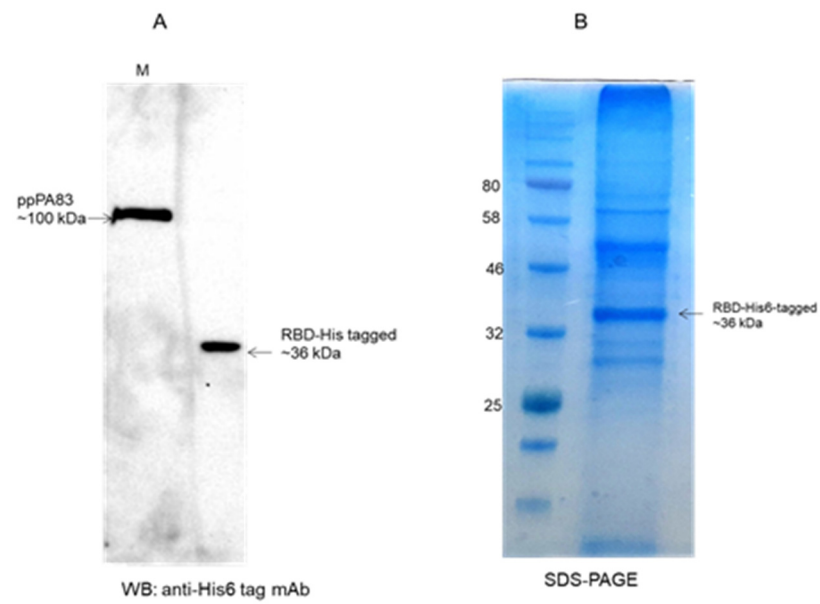

**Figure S1.** Western blot and SDS-PAGE analysis of His6-tagged RBD. (A) Western blot analysis of crude extract of *N. benthamiana* plant infiltrated with pEAQ-RBD -His6. (B) SDS-PAGE analysis of Ni-column purified RBD-His6 tagged protein, purified from *N. benthamiana* plant.
